# Supplementary material for: LINC00152 promotes proliferation in hepatocellular carcinoma by targeting EpCAM via the mTOR signaling pathway
Source: PubMed Central journal article supplement (PMC4767473; doi:10.18632/oncotarget.5970), 2015-10-26
Supplement: oncotarget-06-42813-s001.pdf [file oncotarget-06-42813-s001.pdf]

SUPPLEMENTARY FIGURES AND TABLE

A

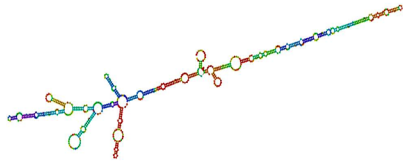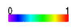

B

^ EVIDENCE FEATURES SUMMARY

|                   |                |                  |  |
|-------------------|----------------|------------------|--|
| HOMOLOGY FEATURES | HIT NUM        | 2                |  |
|                   | HIT SCORE      | 39.0228787452803 |  |
|                   | FRAME SCORE    | 507.595021856284 |  |
| ORF_FRAMEFINDER   | COVERAGE       | 84.42 %          |  |
|                   | LOG-ODDS SCORE | 63.54            |  |
|                   | TYPE           | Partial          |  |

legend: non-coding coding

C

Protein coding potential

|   | Metric                           | Raw result | Interpretation |
|---|----------------------------------|------------|----------------|
|   | PRIDE reprocessing 2.0           | 0          | non-coding ?   |
|   | Lee translation initiation sites | 0          | non-coding ?   |
| + | PhyloSCF score                   | -75.9943   | non-coding ?   |
|   | Bazzini small ORFs               | 0          | non-coding ?   |

In stringent set: yes

D

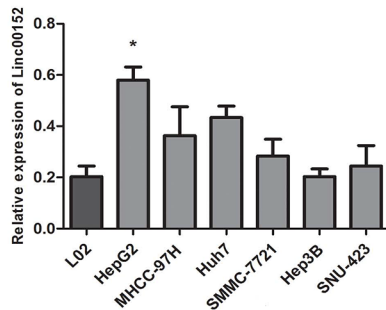

E

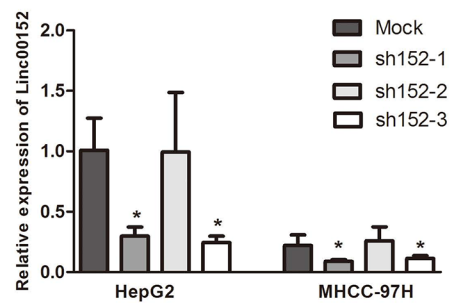

**Supplementary Figure S1: Non-coding RNA validation and the expression of LINC00152 in cell lines.** A. The second structure of LINC00152. B, C. Non-coding RNA validation by bioinformatics prediction. D. Different expression level of LINC00152 in HCC cells. E. Expression of LINC00152 in cells treated with shRNA-1, shRNA-2, shRNA-3 and the empty plasmid. Data were presented as the mean ± SEM. \* indicates a significant difference compared with controls ( $P < 0.05$ ).

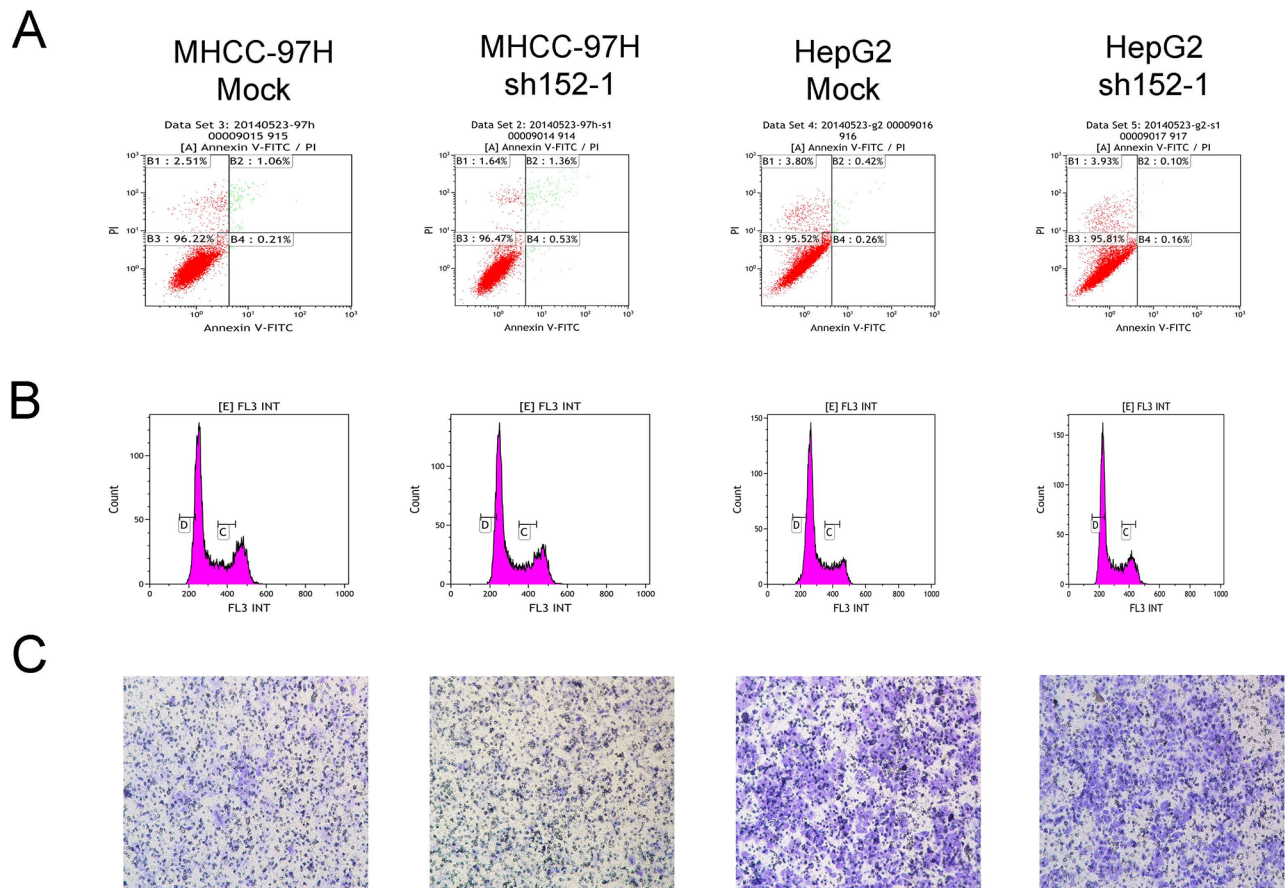

**Supplementary Figure S2: No significant of LINC00152 on cell apoptosis, cell cycle or invasion.** Cells were treated with shRNA of LINC00152 and empty plasmid in MHCC-97H and HepG2. **A, B.** Apoptosis and cell cycle detection by Flow Cytometry assay. **C.** Invasion was detected by Transwell assay with matrigel.

**Supplementary Table S1: Detailed sequence information of primers and shRNAs**

|           | Forward primer (5'-3')    | Reverse primer (5'-3') |
|-----------|---------------------------|------------------------|
| Linc00152 | CTCCAGCACCTCTACCTGTTG     | GGACAAGGGATTAAGACACACA |
| EpCAM     | GGCTCTTTAAGCCAAGCAG       | CACTCGCTCAGAGCAGGTTAT  |
| GAPDH     | GCACCGTCAAGGCTGAGAAC      | GGATCTCGCTCCTGGAAGATG  |
| 5S RNA    | GGAGAGGGAGCCTGAGAAACG     | TTACAGGGCCTCGAAAGAGTCC |
| sh152-1   | TCTATGTGTCTTAATCCCTTGTCCT |                        |
| sh152-3   | TGTGGACTCTGAGGCCTCTGCATT  |                        |
